1 BonA from *Acinetobacter baumannii* forms a divisome-  
2 localized decamer that supports outer envelope function

3 Rhys Grinter<sup>1\*</sup>, Faye C. Morris<sup>1</sup>, Rhys A. Dunstan<sup>1</sup>, Pok Man Leung<sup>1</sup>, Matthew Belousoff<sup>1,2</sup>,  
4 Sachith D. Gunasinghe<sup>1,3,4</sup>, Simone Beckham<sup>5</sup>, Anton Y. Peleg<sup>1,6</sup>, Chris Greening<sup>1</sup>, Jian Li<sup>1</sup>, Eva  
5 Heinz<sup>1,7</sup> & Trevor Lithgow<sup>1,\*</sup>

6

7 <sup>1</sup> Infection and Immunity Program, Biomedicine Discovery Institute and Department of  
8 Microbiology, Monash University, Clayton 3800, Australia

9 <sup>2</sup> Drug and Development Biology, Monash Institute of Pharmaceutical Sciences, Monash  
10 University, Parkville 3052, Australia

11 <sup>3</sup> EMBL Australia Node in Single Molecule Science, University of New South Wales, Sydney  
12 2052, Australia.

13 <sup>4</sup> ARC Centre of Excellence in Advanced Molecular Imaging, University of New South  
14 Wales, Sydney 2052, Australia

15 <sup>5</sup> La Trobe Rural Health School, College of Science, Health and Engineering, La Trobe  
16 University, Bendigo, 3550, Australia.

17 <sup>6</sup> Department of Infectious Diseases, The Alfred Hospital and Central Clinical School,  
18 Monash University, Melbourne, VIC, Australia

19 <sup>7</sup> Liverpool School of Tropical Medicine, Liverpool, United Kingdom

20

21

22

23

24

25

26

27

28 \* To whom correspondence should be addressed: [rhys.grinter@monash.edu](mailto:rhys.grinter@monash.edu);  
29 [trevor.lithgow@monash.edu](mailto:trevor.lithgow@monash.edu)

30

31

32

### 33 **Abstract**

34 *Acinetobacter baumannii* is a high-risk pathogen due to the rapid global spread of multi-drug  
35 resistant lineages. Its phylogenetic divergence from other ESKAPE pathogens means that  
36 determinants of its antimicrobial resistance can be difficult to extrapolate from other widely  
37 studied bacteria. A recent study showed that *A. baumannii* upregulates production of an outer-  
38 membrane lipoprotein, which we designate BonA, in response to challenge with polymyxins.  
39 Here we show that BonA has limited sequence similarity and distinct structural features  
40 compared to lipoproteins from other bacterial species. Analyses through X-ray crystallography,  
41 small-angle X-ray scattering, electron microscopy, and multiangle light scattering demonstrate  
42 that BonA has a dual BON-domain architecture and forms a decamer via an unusual  
43 oligomerization mechanism. This analysis also indicates this decamer is transient, suggesting  
44 dynamic oligomerization plays a role in BonA function. Antisera recognizing BonA shows it is  
45 an outer membrane protein localized to the divisome. Loss of BonA modulates the density of  
46 the outer membrane, consistent with a change in its structure or link to the peptidoglycan, and  
47 prevents motility in a clinical strain (ATCC 17978). Consistent with these findings, the  
48 dimensions of the BonA decamer are sufficient to permeate the peptidoglycan layer, with the  
49 potential to form a membrane-spanning complex during cell division.

## 50 Introduction

51 *Acinetobacter baumannii* is a notorious ‘red alert’ pathogen, considered an urgent threat to  
52 human health by international infectious disease control agencies [1-4]. As a member of the  
53 gammaproteobacterial family *Moraxellaceae*, *A. baumannii* is genetically and physiologically  
54 divergent from well-studied model Gram-negative *Enterobacteriaceae* such as *Escherichia coli*.  
55 *A. baumannii* has a unique cell envelope that allows it to survive exposure to disinfectants and  
56 desiccation that readily kill other bacterial species, allowing it to persist for long periods on  
57 artificial surfaces in hospitals [5, 6]. Additionally, *A. baumannii* is notorious for its innate and  
58 acquired antibiotic resistance [2]. It is currently estimated that as many as 50% of all *A.*  
59 *baumannii* infections in the USA are caused by strains resistant to carbapenems and many  
60 strains acquire polymyxin resistance during treatment [7, 8].

61

62 Like other Gram-negative bacteria, *A. baumannii* has a cell envelope consisting of an inner and  
63 outer membrane. This dual membrane encloses the periplasm, a crowded compartment that  
64 contains a thin layer of peptidoglycan [9]. The outer membrane of *A. baumannii* is an intricate  
65 structure, consisting of an asymmetric lipid bilayer with an inner leaflet composed of  
66 phospholipids and an outer leaflet composed of lipooligosaccharide (LOS) [10]. The LOS  
67 derived surface of the outer membrane acts as a barrier to hydrophobic molecules [11]. In  
68 addition to LOS and phospholipids, the outer membrane contains numerous proteins that are  
69 either integrated into or anchored onto the membrane [12].

70

71 To maintain the integrity of the outer membrane, Gram-negative bacteria actively maintain its  
72 lipid asymmetry and coordinate its biogenesis rate with the overall rate of cell growth.  
73 Additionally, the outer membrane must be constricted in conjunction with the peptidoglycan  
74 cell wall during division [13]. To achieve this, Gram-negative bacteria have evolved a network  
75 of interlinked pathways for the construction and maintenance of the outer membrane [12, 14-  
76 22]. Despite considerable progress in understanding how these pathways function in *E. coli*, in  
77 many cases, the proteins that constitute them are not well characterized, and additional  
78 pathways likely remain to be identified [12, 20, 23]. In species divergent from *E. coli*, such as  
79 *A. baumannii*, these knowledge gaps are much more substantial.

80

81 Among these knowledge gaps is the role of dual-BON domain proteins, a widespread family of  
82 outer envelope proteins in Gram-negative bacteria. Dual-BON family proteins contain a pair of  
83 Bacterial OsmY and Nodulation (BON) domains, which fold into a conserved  $\alpha/\beta$  sandwich [24].  
84 They possess a signal peptide targeting them to the periplasm, and some family members  
85 possess a lipobox with an N-terminal acylated cysteine, mediating peripheral outer membrane  
86 association [25, 26]. They lack conserved residues indicative of an enzyme active site, though  
87 some family members bind phospholipids [27, 28]. Archetypical members of this dual-BON  
88 domain family are the outer membrane-associated lipid-binding protein DolP (formerly YraP)  
89 and the soluble periplasmic protein OsmY, both of which play a role in the construction and  
90 maintenance of the bacterial outer envelope [25, 26, 29]. OsmY is an abundant periplasmic  
91 protein in *E. coli* induced in response to stressors such as osmotic shock, heat shock, acidic pH,  
92 and bile salts [25, 30]. Recently, it was shown that OsmY functions as a chaperone, enhancing  
93 the stability of periplasmic proteins and the assembly of a subset of outer membrane proteins  
94 [31].

95  
96 DolP is a lipoprotein widely present in Gram-negative bacteria. In *E. coli* and *Neisseria*  
97 *meningitidis*, it localizes to the inner leaflet of the outer membrane via an N-terminal lipid  
98 anchor [32-34]. DolP was initially identified in *E. coli* as a lipoprotein whose expression is  
99 induced under cell envelope stress and it forms part of the  $\sigma^E$  regulon [35]. Mutants of *E. coli*,  
100 *N. meningitidis*, and *Salmonella enterica* lacking DolP are compromised in outer membrane  
101 integrity, rendering the cells more sensitive to agents like the detergent SDS or the antibiotic  
102 vancomycin [26, 28, 33, 35, 36]. Likely as a result of impaired outer membrane integrity, loss  
103 of DolP leads to attenuation of virulence in rodent models of infection [26]. Despite the  
104 phenotypic characterization of mutants lacking DolP, suggesting a role in outer membrane  
105 biogenesis [37, 38], the specific biochemical function of DolP remains to be established. In *E.*  
106 *coli*, DolP is recruited to the site of cell division [32]. This recruitment is required for the  
107 regulation of cell wall remodeling during cell division [32, 39]. A recent study resolved the  
108 structure of DolP from *E. coli*, showing that it conforms to a dual-BON domain architecture and  
109 is monomeric [28]. This study demonstrated that DolP binds anionic phospholipids via  $\alpha$ -helix  
110 1 of its C-terminal BON domain, and that phospholipid binding is required for its function and  
111 localization. Interestingly, despite relatively low overall sequence identity, the sequence of this



112 lipid binding helix is highly conserved in DolP from *N. meningitidis* [29], suggesting a conserved  
113 function for these proteins.

114

115 The focus of this study is a dual-BON domain protein synthesized by *A. baumannii*. Our previous  
116 work has shown that this bacterium can become resistant to the LOS-binding antibiotic  
117 polymyxin through mutations that prevent LOS production [40]. These mutants survive with  
118 an outer membrane where phospholipids compose the only lipid species in both leaflets of the  
119 membrane [40]. In both wild-type polymyxin treated cells and in polymyxin resistant LOS-  
120 deficient mutants, a dual-BON domain family lipoprotein protein (HMPREF0010\_02957,  
121 ABBFA\_002498) is upregulated [41, 42]. This suggests that this protein, which we designate  
122 BonA, plays a role in adapting to the effects of polymyxin on the *A. baumannii* outer envelope,  
123 and to the loss of LOS. BonA is only distantly related to either DolP or OsmY and we show that,  
124 unlike DolP, its loss does not lead to a gross outer membrane permeability defect. Alternatively,  
125 *A. baumannii* mutants lacking BonA have an altered outer membrane structure and a defect in  
126 cell motility. Like DolP, single-cell imaging of *A. baumannii* indicates that BonA is localized to  
127 the divisome. However, BonA lacks conserved amino acids that mediate phospholipid binding  
128 by DolP, indicating a divergent function at this location. Through structural and biophysical  
129 analysis, we show that BonA forms a decamer and that this oligomerization is stabilized by a  
130 novel mechanism, involving rearrangement of the BON-domain fold. This oligomerization  
131 provides a rationale for explaining how BonA functions in the absence of a conserved lipid-  
132 binding motif or active site and is consistent with a scaffold or chaperone function for the  
133 protein. Based on its unique structure, dynamic oligomerization, and role in outer membrane  
134 maintenance, this study establishes BonA as a third branch of the dual-BON domain family,  
135 distinct from OsmY and DolP found in other bacteria.

## 136 Results

137

### 138 **BonA from *A. baumannii* is a member of a diverse family of dual-BON domain outer-membrane** 139 **lipoproteins**

140 Analysis of *A. baumannii* genomes showed that they encode only one BON domain family  
141 protein. The amino acid sequence of this lipoprotein contains dual-BON domains, a terminal  
142 lipobox with an acyl-anchoring cysteine residue, and N- and C-terminal extensions (Figure 1A).  
143 BonA shows high sequence divergence from DolP from *E. coli* (23% identity) and *Neisseria* spp.  
144 (24% identity), and is even more distantly related to OsmY from *E. coli* (20% identity) (Table  
145 S1). A phylogenetic tree confirmed the distant evolutionary relationship between BonA and  
146 other dual-BON domain lipoproteins identified in a HMMER search of the reference proteome  
147 database (Figure 1B, Table S2) [43]. BonA belongs to a distinct clade clustering with proteins  
148 from other members of the family *Moraxellaceae*. A C-terminal proline-rich extension is  
149 present in BonA and other related sequences from *Acinetobacter* and *Moraxella* species but is  
150 absent from DolP and OsmY (Figure 1A, Figure S1).

151

152

### 153 **BonA is localized to the divisome and its deletion prevents motility**

154 The distant evolutionary relationship between BonA and other dual-BON family proteins poses  
155 the question of whether these proteins share a conserved function. To address this we sought  
156 to determine the subcellular localization and physiological role of BonA. Mutants of the well-  
157 characterized *A. baumannii* type strain ATCC 19606 and clinical isolate ATCC 17978 were  
158 constructed ( $\Delta bonA$ ). Antibodies raised to BonA detected the protein in wildtype *A. baumannii*  
159 ATCC 19606, but not in the  $\Delta bonA$  strain when membrane extracts were analyzed by SDS-PAGE  
160 and immunoblotting (Figure 2A). To monitor the subcellular localization of BonA, cell  
161 membrane extracts were fractionated via a sucrose gradient, followed by immunoblotting,  
162 revealing that BonA is localized to the outer membrane as predicted by its N-terminal lipobox  
163 (Figure 2B).

164

165 While the relative abundance of proteins present in *A. baumannii* ATCC 19606  $\Delta bonA$   
166 membranes was similar to wildtype, the outer-membrane fraction from the  $\Delta bonA$  strain  
167 progressed markedly further into the sucrose gradient. This suggests that its structure or

168 composition is altered, leading to an increase in density (Figure 2B). However, no significant  
169 increase in sensitivity to SDS, vancomycin, or tetracycline was observed (Table S3), suggesting  
170 that loss of BonA does not impair the integrity of the outer membrane in *A. baumannii*. Loss of  
171 motility on a swarm plate assay was observed in the *A. baumannii* ATCC 17978  $\Delta$ *bonA* strain,  
172 which could be complemented by the addition of *bonA* in trans (Figure 2E). ATCC 19606 is non-  
173 motile in this assay, and so this phenotype could not be tested in this strain (Figure S2). While  
174 *A. baumannii* lacks flagella, twitching motility is observed in some strains of this species,  
175 thought to be mediated by the type IV pilus [44]. Type IV pili are dynamic protein filaments  
176 that are assembled and secreted from the cell via a large protein complex that spans the  
177 bacterial cell envelope [45]. The loss of twitching motility observed in the ATCC 17978  $\Delta$ *bonA*  
178 mutant suggests that BonA plays either a direct or indirect role in the assembly or function of  
179 this molecular machine.

180

181 Like BonA, DolP is a lipoprotein anchored to the outer membrane. DolP is localized to the  
182 divisome where it plays a role in regulating peptidoglycan remodeling during cell division [32].  
183 To determine if BonA shares a common localization, we used the antibodies to monitor BonA  
184 in single cells via immunofluorescence microscopy. Consistent with localization to the  
185 divisome, fluorescence corresponding to BonA was observed as a central band in what  
186 appeared to be elongated, early-stage dividing cells. This band constricted in concert with the  
187 cell-division septum (Figure 2C). No fluorescence beyond background was observed in  $\Delta$ *bonA*  
188 cells (Figure 2C). To investigate the native structure of BonA, membrane extracts were  
189 solubilized in detergent and analyzed by blue-native PAGE. The vast majority of BonA was  
190 detected at a molecular weight of ~60 kDa, consistent with a dimer or trimer of the 23 kDa  
191 protein (Figure 2D). Longer exposure of the immunoblots revealed a smaller proportion of  
192 BonA was detected as a larger oligomeric species (250-300 kDa).

193

194

### 195 **The crystal structure of BonA indicates functional divergence from other dual-BON proteins**

196 To gain insight into the structural organization of BonA compared to other dual-BON proteins,  
197 as well as its architecture at the outer membrane, we solved its crystal structure. Crystal trials  
198 were performed with full-length BonA as well as several truncation constructs. High-quality  
199 crystals were only obtained for N-terminally truncated BonA, missing the 27 amino acids after

200 its lipid anchoring cysteine. The structure of this protein, designated BonA-27N, was solved at  
201 1.65 Å by single-wavelength anomalous dispersion (SAD) phasing, using selenomethionine  
202 labeled protein. The structure of BonA-27N was built and refined from the resulting electron  
203 density maps (Table S4, Figure 3A). The crystal structure of BonA-27N consists of two  $\alpha/\beta$ -  
204 sandwich BON domains that interact extensively via the external face of their three-strand  $\beta$ -  
205 sheets (Figure 3A). In contrast to the structure of DolP in which both domains adopt a canonical  
206 BON domain fold [28], in the BonA structure,  $\alpha$ -helix 1 ( $\alpha$ H1) of BON domain 1 (BON1) does  
207 not adopt the expected BON domain conformation of running parallel to the BON domain  $\beta$ -  
208 sheet. Rather it is displaced from the rest of the domain (Figure 3A). The 39 amino acids of the  
209 C-terminal extension of BonA-27N (AAs 196 to 235) are disordered in the crystal structure. This  
210 region of BonA is not present in DolP or OsmY and is predicted to be largely unstructured  
211 (Figure 1A).

212

213 Analysis of BonA-27N crystallographic symmetry reveals that it exists as a dimer, aligned with  
214 the crystallographic two-fold axis (Figure 3B). Analysis with the molecular interface prediction  
215 tool PISA [46] predicts that this interface is *bona fide* (Table S5). The symmetrical BonA-27N  
216 dimer interacts via an extensive interface encompassing both BON domains (Figure 3B). The  
217 interface is stabilized by  $\alpha$ -helix 1 ( $\alpha$ H1) of BON domain 2 (BON2), which substitutes for the  
218 displaced  $\alpha$ H1 of BON1, thus completing the  $\alpha/\beta$ -sandwich fold of BON1 (Figure 3C). This  
219 interaction of  $\alpha$ H1 of BON2 with BON1 is largely mediated by hydrophobic interactions (Figure  
220 3D), with Tyr118 and Met122 of  $\alpha$ H1 of BON2 extending deeply into a hydrophobic pocket  
221 created by the displacement of  $\alpha$ H1 of BON1 (Figure 3E). While the interactions between  $\alpha$ H1  
222 of BON2 and BON1 are largely hydrophobic, the dimer interface of BonA-27N is mediated by a  
223 mixture of interaction types, including 14 hydrogen bonds and four salt bridges (Figure 3G,  
224 Table S5). The interface also contains two symmetrical, highly solvated pockets, which trap a  
225 total of 34 water molecules, as well as two  $Zn^{2+}$  ions which were present at a high concentration  
226 in the crystallization solution (Figure 3F).

227

228 Altogether, these findings show that BonA is structurally and functionally distinct from other  
229 dual-BON family proteins. In contrast to BonA, the structure of DolP from *E. coli* reveals it is  
230 monomeric and its BON1 domain adopts the canonical  $\alpha/\beta$ -sandwich fold. Additionally, rather  
231 than mediating oligomerization,  $\alpha$ H1 of BON2 of DolP from *E.coli* is responsible for binding to

232 anionic phospholipids present in the outer-membrane, via residues that are not conserved in  
233 BonA [28]. These differences indicate BonA is structural and functionally divergent to the DoLP  
234 branch of the dual-BON domain protein family. A recent study by Wu et. al. supports the  
235 physiological relevance of the BonA dimer, demonstrating via a global proteomic approach that  
236 intermolecular interaction occurs between BonA molecules in *A. baumannii* cells [47]. This  
237 study identified intermolecular crosslinks between lysines 50, 59, and 65 of neighboring BonA  
238 molecules in *A. baumannii* cells. In the BonA-27N structure, lysine 59 and 65 are located in  $\alpha$ H1  
239 of BON1 and are within proximity to their dimer equivalent in our BonA-27N structure (Figure  
240 S3). Lysine 50 is unresolved in the crystal structure, but given this region of BonA is crucial for  
241 oligomerization, it is also a plausible candidate for crosslinking based on our data.

242

243

#### 244 **BonA decamerises under physiological conditions through interactions mediated by its N-** 245 **terminal extension**

246 Our structural and biochemical analysis indicated that BonA oligomerizes in *A. baumannii* cells  
247 and as a recombinant protein. To investigate the oligomeric state of BonA, the mature  
248 recombinant protein (lacking its signal sequence) was analyzed by size exclusion  
249 chromatography (SEC). In the absence of detergent, BonA migrated predominately as a high-  
250 molecular weight species, with some disassociation to a lower-molecular weight species  
251 observed. To gain a more precise understanding of the molecular weight of this oligomer,  
252 purified BonA was analyzed by analytical ultracentrifugation, revealing the presence of a single  
253 species with a molecular mass of approximately 240 kDa (Figure S4A). The molecular mass of  
254 the BonA oligomer was confirmed by size-exclusion chromatography coupled multiangle laser-  
255 light scattering (SEC-MALS), which indicated this species has a molecular mass of 233 kDa,  
256 which is consistent with a decamer, while the smaller species has a mass of 23 kDa,  
257 corresponding to a BonA monomer (Figure 4B). To determine if the N or C-terminal extensions  
258 flanking the core BonA BON domains were responsible for oligomerization, truncation  
259 constructs lacking the N-terminal 27 amino acids succeeding the lipobox and/or the C-terminal  
260 45 amino acids were analyzed via SEC-MALS (Figure 1A, Figure 4A). Removal of the C-terminal  
261 extension increased the tendency of BonA to aggregate but did not affect the oligomeric state  
262 of the protein, with a decamer of 205 kDa observed for the truncated protein (Figure 4C).  
263 Conversely, loss of the 27 N-terminal amino acids abrogated oligomerization, with only a

264 monomeric species of ~22 kDa observed (Figure 4D). Loss of both the N- and C-terminal regions  
265 also resulted in a monomeric protein, further confirming the role of the N-terminus of BonA in  
266 oligomerization (Figure 4E). In conclusion, BonA forms a decamer that requires its N-terminal  
267 extension and undergoes spontaneous disassociation into a monomeric species in solution.  
268 The monomeric nature of BonA-27N in solution contrasts with the dimer observed in its crystal  
269 structure, suggesting that weak interactions between monomers of this truncated protein are  
270 selected for during crystallization.

271

272 To understand the basis of oligomerization of BonA, both full-length and BonA-27N were  
273 analyzed via size-exclusion coupled small-angle X-ray scattering (SEC-SAXS) (Figure S5, Table  
274 S6). Despite the C-terminal extension, which largely lacks predicted secondary structure and  
275 was disordered in the BonA-27N crystal structure, SAXS scattering indicates that decameric  
276 BonA forms a compact particle in solution with maximum dimensions of ~164 Å (Figure S5C,  
277 D). In contrast, SAXS scattering indicates that BonA-27N is highly flexible in solution with  
278 maximum dimensions of 107 Å, which is indicative of an unstructured and fully extended C-  
279 terminus (Figure S5G, H). These differences between decameric and monomeric BonA suggest  
280 that intermolecular interactions stabilize the C-terminus of the oligomeric form of the protein.

281

282 Molecular envelopes of full-length and BonA-27N were modeled based on SAXS scattering  
283 data. For full-length BonA, C5 symmetry was imposed, based on the decameric organization of  
284 the oligomer and the dimer observed in the crystal structure. The resulting molecular envelope  
285 was prolate, with dimensions of ~172 by 102 Å. Five dimers of the BonA-27N crystal structure  
286 could be modeled with C5 symmetry into a bulge at the center for the envelope. The N and C-  
287 termini of all molecules are orientated in the same direction, which is required by the lipid  
288 anchored N-terminus of BonA. Regions truncated or disordered in the BonA-27N crystal  
289 structure could be accommodated by the remainder of the molecular envelope (Figure 4F).  
290 The molecular envelope of BonA-27N was indicative of a monomer, with dimensions of ~133  
291 by 40 Å. The crystal structure of BonA-27N could be modeled into a bulge at one end of the  
292 envelope, with additional space accounting for the unstructured C-terminal extension (Figure  
293 4G). The simulated scattering curves for both envelopes were an excellent fit for the  
294 experimental data (Figure 4H).

295

296 To validate our SAXS based modeling of the BonA decamer, we further investigated full-length  
297 BonA via negative-stain electron microscopy (NS-EM). Initial analysis of EM-grids prepared with  
298 native BonA did not contain discrete particles. To stabilize the decamer, on-column  
299 glutaraldehyde crosslinking was performed, stabilizing BonA as first a dimeric and then a  
300 decameric species with increasing glutaraldehyde concentration (Figure S4B). NS-EM of the  
301 crosslinked sample revealed largely uniform monodisperse particles (Figure S4C). 2D-class  
302 averages derived from these images are suggestive of a particle with dimensions compatible  
303 with the BonA SAXS envelope and C5 symmetry as predicted by other analyses (Figure 4I).

304

## 305 Discussion

306 In this work, we identify BonA, a novel member of the bacterial dual-BON domain family of  
307 proteins, produced by *A. baumannii* and encoded by other members of the family  
308 *Moraxellaceae*. We demonstrate that BonA is anchored to the outer membrane where it plays  
309 a role in maintaining membrane structure and is required for twitching motility. Through  
310 structural analysis, we show that BonA possesses unique structural features and forms a  
311 divisome localized decamer that likely mediates its function (Figure 5). We show that while  
312 BonA shares a common outer membrane and divisome localization to DolP from *E. coli* and  
313 *Neisseria* spp. [26, 29, 35], its loss does not lead to the gross defects in outer membrane  
314 permeability observed in DolP deletion mutants. Furthermore, while DolP is monomeric and  
315 mediates its function and localization via phospholipid binding [28], BonA is a decamer that  
316 lacks the conserved lipid-binding residues found in DolP [28]. These differences suggest a role  
317 for BonA in outer-envelope function that is distinct from that of DolP and indicates functional  
318 divergence within the dual-BON domain protein family.

319

320 The change in outer membrane density associated with the loss of BonA suggests a significant  
321 alteration in the structure or composition of this membrane or the physical membrane-  
322 peptidoglycan links. Consistent with this, the loss of twitching motility observed in *A.*  
323 *baumannii* ATCC 17978  $\Delta$ *bonA*, likely mediated by an outer-envelope spanning type IV pilus  
324 [44], is suggestive of a perturbed outer envelope. These data are also consistent with our  
325 previous finding that BonA is upregulated in response to outer membrane destabilizing

326 polymyxins [40, 41], and broadly indicates a role for BonA in supporting optimal outer  
327 membrane function.

328

329 While further work is required to determine the precise role of BonA in outer membrane  
330 function, our structural analysis provides important insights into BonA function. We show that  
331 BonA forms a decamer that is  $\sim 172$  Å in length. In the context of the periplasmic space, where  
332 the nominal distance between the outer and inner membranes is  $\sim 200$  Å [48], outer  
333 membrane-anchored BonA would span the majority of the periplasm if extending  
334 perpendicular from the membrane (Figure 5). In this configuration, BonA would penetrate the  
335 peptidoglycan layer and would be capable of interacting with proteins embedded in the inner  
336 membrane, thus bridging the inner and outer membranes. When localized to the site of cell  
337 division, BonA could tether the outer membrane to the peptidoglycan or the membrane-  
338 spanning divisome complex (Figure 5). In support of this hypothesis, in-cell crosslinking data  
339 shows interactions occur between BonA and OmpA in *A. baumannii* [47], with OmpA playing  
340 a role in tethering the outer membrane to the peptidoglycan [49]. The transient nature of BonA  
341 oligomerization is also consistent with a role in coordinating a dynamic process during cell  
342 division. If BonA is indeed important for coordinating the outer envelope during cell division,  
343 its loss would lead to improper remodeling of this structure, which is consistent with the  $\Delta bonA$   
344 phenotypes we observe.

345

346 The cell envelope provides a key defense for *A. baumannii* against antimicrobial compounds  
347 and environmental stress. To effectively combat *A. baumannii* infection and its persistence in  
348 the hospital environment, we must develop strategies to overcome the outer envelope's  
349 defenses. To do so, a robust understanding of the key factors required for outer membrane  
350 construction and maintenance is required. Our work on BonA informs this understanding and  
351 provides insights into the unique role of this protein in supporting outer membrane function  
352 in *A. baumannii*.

353

354

355



## 356 **Materials and Methods**

357

### 358 **Protein sequence analysis**

359 To determine the relationship between distantly related dual-BON domain family members we  
360 constructed a tree of BonA homologs, identified with a HMMER search of the reference  
361 proteomes database using BonA as a query sequence [43]. BonA homologs identified in the  
362 HMMER search were curated to only include proteins with a dual-BON domain architecture  
363 and a lipobox sequence determined using SignalP 5.0 [50]. This yielded 896 sequences, which  
364 were further reduced for tree construction using CD-Hit to filter sequence with a pairwise  
365 similarity of <75 %, yielding 565 sequences (Table S1) [51]. These 565 protein sequences, plus  
366 OsmY from *E. coli* as a sequence to define the root branch, were aligned using MUSCLE [52]  
367 implemented in the phylogenetic analysis program MEGAX (v.10.1.7) [53], which was  
368 subsequently used as the input for constructing a maximum likelihood (ML) phylogenetic tree  
369 to infer evolutionary relationships for this protein family. The best amino acid substitution  
370 model was inferred using MEGAX which compared 56 different models; the Jones-Taylor-  
371 Thornton (JTT) model with a gamma distribution of 5 discrete gamma categories and invariant  
372 sites (G + I) was selected. To infer tree topology, the default ML heuristic method ML Nearest-  
373 Neighbor-Interchange (NNI) was applied and initial trees were made with Neighbour-Joining  
374 and BioNJ algorithms. The final tree was built by including all residues and bootstrapping with  
375 100 replicates.

376

### 377 **Strain propagation, maintenance, and antimicrobial susceptibility testing**

378 *E. coli* and *A. baumannii* were propagated in lysogeny broth (LB) and LB agar at 37°C.  
379 Antimicrobial susceptibility was conducted per CLSI guidelines using the broth microdilution  
380 method and cation adjusted Muller Hinton broth. Minimum inhibitory concentrations (MIC)  
381 were defined as >80% reduction in growth, and significance considered as >2 concentration  
382 increase or decrease in MIC relative to the wild type control.

383

### 384 **Construction of $\Delta$ bonA strains in *A. baumannii***

385 Plasmid DNA, genomic DNA, and PCR products were purified using relevant kits from Bioneer,  
386 QIAGEN, and Promega, respectively, following the manufacturer's instructions. The *A.*

387 *baumannii*  $\Delta$ *bonA* mutants were constructed as described previously [54], with minor  
388 modifications. Briefly, the kanamycin resistance cassette was PCR amplified from pKD4 using  
389 disruption primers containing >80 bases of homology to the *bonA* flanking sequence (as  
390 described in Table S6). The resultant fragments were gel purified and introduced  
391 into *A.baumannii* strains ATCC17978 and ATCC19606 by electroporation as previously  
392 described [55], with selection on LB agar supplemented with 50  $\mu$ g/ml kanamycin. The  
393 mutations were confirmed by PCR amplification using primers flanking the insertion, followed  
394 by Southern hybridization of genomic DNA digested with *EcoRV*, probed with kanamycin and  
395 *bonA* specific DIG-labeled probes, as described previously [56].

396 For complementation, the full-length *bonA* sequence plus 500 nucleotides upstream of the  
397 translational start site (deemed to include the native promoter) were PCR amplified from  
398 ATCC19606 with forward and reverse complementation primers encoding 5' *AatII* and *EcoRI*  
399 restriction sites, respectively. The resultant fragments were digested and ligated into the *E.*  
400 *coli*-*Acinetobacter* shuttle vector, pWH1266 [57]. The p*BonA* constructs were confirmed by  
401 sequencing before electroporation into the respective mutant strains as described previously,  
402 with the pWH1266 vector-only used as a control.

403

#### 404 **Twitching motility assays**

405 Twitching motility was assessed as described previously [44]. Briefly, a 1  $\mu$ l drop of stationary  
406 phase culture was placed onto the center of a 0.25% modified LB agarose and incubated at  
407 37°C for up to 48 hours. Three independent experiments were performed for each.

408

#### 409 **BonA antisera generation**

410 Polyclonal rabbit antisera for the detection of BonA was generated at the Monash Animal  
411 Research Platform, from recombinant proteins purified in-house. Rabbits were serially injected  
412 with purified protein (10 mg/ml) in combination with complete (first injection) or incomplete  
413 (subsequent injections) Freund's adjuvant, over 1-3 months, with clarified rabbit sera  
414 periodically tested for reactivity to the target protein. Once acceptable levels of reactivity were  
415 achieved rabbits were euthanized and clarified sera were collected and stored at -80 °C.

416

#### 417 **Isolation and fractionation of membranes from *A. baumannii***

418 *A. baumannii* cells were cultured in LB media and grown to an OD<sub>600</sub> of ~0.6 before harvesting.  
419 Membranes were purified and subsequently fractionated by sucrose density fractionation  
420 (60:55:50:45:40:35% w/w) as described previously [58].

421

#### 422 **Detection and localization of BonA in *A. baumannii* cell extracts via Western Blot**

423 For the detection of BonA in cell extracts, 50 µg of isolated total membranes were analyzed by  
424 10% SDS-PAGE or 5-16% blue-native (BN)-PAGE [59] and was subsequently analyzed by  
425 Western blotting against BonA (antibody dilution - 1:20,000). To determine the cellular  
426 localization of BonA, 30 µl aliquots of each fraction from the sucrose gradient were separated  
427 by 10% SDS-PAGE for Coomassie staining and subsequent Western blotting as described  
428 above.

429

#### 430 **Localization of BonA in *A. baumannii* cells by immunofluorescence microscopy**

431 Bacterial cultures were grown to mid-log phase in LB media at 37°C with shaking (200 rpm).  
432 Then 500 µl of culture media was centrifuged (4,000 × g, 5 min, 4°C), washed twice in PBS, and  
433 resuspended in 500 µl of PBS. 8-well, coverglass-bottom chambers (Sarstedt) were coated with  
434 0.01% (v/v) poly-L-lysine (Sigma-Aldrich, P8920) for 10 min at room temperature before excess  
435 poly-L-lysine was removed. Afterward, 200 µl of bacterial cell suspension was immobilized  
436 onto each well. To ensure a monolayer of bacteria was formed at the bottom of each well,  
437 chamber slides were subjected to centrifugation (4,000 × g, 3 min, 4°C), followed by several  
438 washing steps to remove non-adhered cells. The monolayer of bacteria was then fixed with a  
439 mixture of paraformaldehyde (2% w/v) and glutaraldehyde (0.2% v/v) in PBS for 5 min at 4°C,  
440 which was then washed with PBS to remove excess fixatives. To reduce auto-  
441 fluorescence caused by the background, samples were treated with a fluorescence quencher,  
442 0.1% (w/v) NaBH<sub>4</sub> in PBS for 15 min, followed by several washing steps of PBS. Samples were  
443 then permeabilized with Triton X-100 (0.001% v/v in PBS), followed by three washing steps  
444 with PBS.

445 Before antibody staining, samples were blocked with 5% (w/v) BSA in PBS for 1 hr at room  
446 temperature, followed by incubation with anti-BonA antisera (1:1,000 in 5% w/v BSA in PBS)  
447 for 1-hr mixing by rotary inversion at room temperature. Samples were washed thoroughly  
448 with PBS to remove excess antiserum. Secondary staining was carried out for 45 mins at room  
449 temperature using anti-rabbit immunoglobulin G (IgG)-Alexa Fluor 488 (ThermoFisher®, A-

450 11008) diluted to 1:3,000 (in 5% BSA in PBS), followed by several washing steps to remove  
451 excess antibody. Olympus IX-81 inverted fluorescence microscope equipped with Olympus  
452 Cell<sup>^</sup>M software was used to visualize bacteria samples using the 100× objective with  
453 fluorescein isothiocyanate (FITC) filter.

454

#### 455 **Protein Expression and Purification**

456 DNA encoding full-length BonA and BonA-C45 were amplified by PCR, with C-terminal NcoI and  
457 XhoI restriction sites and cloned into a pET20b derived vector which added a 10x N-terminal  
458 His-tag followed by a TEV cleavage site, via restriction digest and ligation. The resulting vector  
459 was transformed into *E. coli* BL21 (DE3) C41 cells. DNA encoding BonA-27N, and BonA-27N-  
460 45C were amplified by PCR, minus stop codon, with C-terminal NdeI and XhoI restriction sites  
461 and cloned into pET22b vector which added a 6x C-terminal Histag. The resulting vectors were  
462 transformed into *E. coli* BL21 (DE3) C41 cells. Protein expression was performed in terrific  
463 broth (12 g tryptone, 24 g yeast extract, 61.3 g K<sub>2</sub>HPO<sub>4</sub>, 11.55 g KH<sub>2</sub>PO<sub>4</sub>, 10 g glycerol) with 100  
464 mg/ml ampicillin for selection. Cells were grown at 37°C until OD<sub>600</sub> of 1.0 induced with 0.3  
465 mM IPTG and growth for a further 14 hours at 25°C. For selenomethionine labeled BonA-27N,  
466 the BonA-27N construct was transformed into the methionine auxotrophic *E. coli* strain Crystal  
467 Express (DE3). Cells were grown in M9 minimal media containing 100 mg/l of each amino acids  
468 (minus methionine) and 50 mg/l selenomethionine. Cells were harvested by centrifugation,  
469 lysed using a cell disruptor (Emulsiflex) in Ni-binding buffer (50 mM Tris, 500 mM NaCl, 20 mM  
470 imidazole [pH 7.9]) plus 0.1 mg/ml lysozyme, 0.05 mg/ml DNase I, and cOmplete protease  
471 cocktail inhibitor tablets (Roche). The resulting lysate was clarified by centrifugation and  
472 applied to Ni-agarose resin, followed by washing with 10x column volumes of Ni-binding buffer,  
473 and elution of bound proteins with a step gradient of Ni-gradient buffer (50 mM Tris, 500 mM  
474 NaCl, 500 mM Imidazole [pH7.9]) of 5, 10, 25 and 50%. Eluted fractions containing recombinant  
475 protein were pooled and applied to a 26/600 Superdex S200 size exclusion column equilibrated  
476 in SEC buffer (50 mM Tris, 200 mM NaCl [pH 7.9]). The recombinant protein was then pooled  
477 concentrated to 10 mg/ml, snap-frozen, and stored at -80 °C.

478

#### 479 **Size-exclusion chromatography multiangle light scattering (SEC-MALS)**

480 The absolute molecular masses of BonA-FL and truncated variants were determined by SEC-  
481 MALS. 100- $\mu$ l protein samples (1-5 mg/ml) were injected onto a Superdex 200 10/300 GL size-

482 exclusion chromatography column in 20 mM Tris , 200 mM NaCl [pH 7.9] at 0.6 ml/min with a  
483 Shimadzu LC-20A. The column eluent was fed into a DAWN HELEOS II MALS detector (Wyatt  
484 Technology) followed by an Optilab T-rEX differential refractometer (Wyatt Technology). Light  
485 scattering and differential refractive index data were collected and analyzed with ASTRA 6  
486 software (Wyatt Technology). Molecular masses and estimated errors were calculated across  
487 individual eluted peaks by extrapolation from Zimm plots with a  $dn/dc$  value of 0.1850 ml/g.  
488 SEC-MALS data are presented with absorbance (280 nm) plotted alongside fitted molecular  
489 masses (Mr).

490

#### 491 **Protein crystallization, data collection, and structure solution**

492 Purified BonA proteins were screened for crystallization conditions using commercially  
493 available screens (approximately 800 conditions). Crystals grew from drops containing BonA-  
494 27N in conditions containing 0.2 M Zn Acetate, 0.1 M Na Acetate, 20 % PEG 3350 [pH 4.5],  
495 crystals were optimized in this condition. Crystals were cryoprotected by increasing PEG 3350  
496 concentration to 30% and flash cooled in liquid N<sub>2</sub>. Diffraction data were collected at 100 K at  
497 the Australian Synchrotron on selenomethionine labeled crystals and processed in the space  
498 group P3<sub>1</sub>21 to 1.65 Å. Heavy atom sites were located, phases were obtained using single-  
499 wavelength anomalous dispersion (SAD) and the initial model was built using Autosol from the  
500 Phenix package [60]. Eight heavy atom sites were located, 4 of these sites were Selenium, 4 of  
501 these sites were Zn. The BonA-N27 model was improved manually in Coot and refined using  
502 Phenix refine and Refmac [60-62]. Analysis of the BonA-27N crystal structure was performed  
503 using the Phenix and CCP4 packages, non-crystallographic interfaces were predicted using PISA  
504 [46, 60, 63].

505

#### 506 **Small Angle X-ray Scattering**

507 Small-angle X-ray scattering (SAXS) was performed using Coflow SEC-SAXS at the Australian  
508 Synchrotron [64]. Purified BonA and BonA-27N were analyzed at a pre-injection concentration  
509 of 10 mg/ml. Scattering was collected over a  $q$  range of 0.0 to 0.3 Å<sup>-1</sup>. A buffer blank for each  
510 SEC-SAXS run was prepared by averaging 10-20 frames pre- or post-protein elution. Scattering  
511 data from peaks corresponding to BonA and BonA-27N were then buffer subtracted and scaled  
512 across the elution peak, and compared for inter-particle effects. Identical curves (5-10) from

513 elution were then averaged to provide curves for analysis. Data were analyzed using the  
514 PRIMUS package, ScÅtter, and DAMMIF modeler [65].

515

### 516 **Analytical ultracentrifugation**

517 Sedimentation velocity (SV) was carried out in a Beckman Coulter Optima analytical  
518 ultracentrifuge using an An-50 Ti 8-hole rotor. BonA-FL (370 µl) at concentrations ranging  
519 from 0.25 to 2 mg/ml was loaded into a 12 mm path-length centerpiece and centrifuged at  
520 40,000 rpm for ~6 h at 20°C. Scans were collected every 20 seconds using absorbance optics  
521 (at 230, 240, and 280 nm; a radial range of 5.8 - 7.2 cm, and radial step-size of 0.005 cm). 50  
522 mM Tris, 200 mM NaCl, pH 7.9 was used as the buffer. Data were analyzed with SEDFIT using  
523 the continuous c(s) distribution model [66]. SEDNTERP was used to calculate the partial specific  
524 volume, the buffer density, and viscosity at 15°C and 20°C.

525

### 526 **On column crosslinking and negative-stain electron microscopy**

527 To stabilize the BonA decamer an 'on-column' crosslinking method was used. Initially, 200 µl  
528 of glutaraldehyde solution (0.05-0.5% in dH<sub>2</sub>O) was injected to a pre-equilibrated Superdex  
529 200 10/300 column in buffer (20mM HEPES, 150mM NaCl, [pH 7.4]). The column was run at  
530 0.25 ml/min for 20min (5ml buffer). Subsequently, the column flow was paused, and the  
531 injection loop was flushed using buffer followed by injection of purified BonA (200µl, at 10  
532 mg/ml). Subsequently, the column was run at 0.25 ml/min and 0.5ml fractions were collected.  
533 Collected fractions were immediately quenched by the addition of 50 µl of 50 mM Tris, pH 7.5.  
534 Crosslinking efficiency was visualized by running the individual fractions on a 10 % SDS gel and  
535 cross-linked fractions were flash-frozen for NS-EM analysis.

536 Native and crosslinked BonA were serially diluted in buffer (20mM HEPES, 150mM NaCl, pH  
537 [7.4]) and 5 µl was spotted onto freshly glow-discharged carbon-coated 200-mesh copper grids  
538 (PELCO), followed by blotting to remove all but a thin film of protein solution. Blotted grids  
539 were fixed with the tungsten-based Nano-W stain (Nanoprobes), by adding the stain to each  
540 grid, followed by 60 seconds incubation and blotting, repeated 3 times before air drying. The  
541 grids were imaged on a 120keV Tecnai Spirit G2 microscope (FEI) equipped with a 4K FEI Eagle  
542 camera. Images were processed, particles were picked and 2D classes generated using the  
543 RELION package (V 2.1) [67].

544

545 **Acknowledgments**

546 This research was undertaken on the MX1, MX2, and SAXS/WAXS beamlines at the Australian  
547 Synchrotron, part of ANSTO (CAP12312, and M12480). We would like to thank the Monash  
548 Molecular Crystallisation Facility for their assistance with sample characterization,  
549 crystallographic screening, and optimization. We would like to thank Mr. Hari Venugopal and  
550 the Ramaciotti Centre for Cryo-Electron Microscopy for their assistance with electron  
551 microscopy experiments. We would like to thank Dr. Pankaj Deo for his assistance with  
552 fluorescence microscopy and Dr. Sarah Atkinson for her assistance with the AUC  
553 measurements.

554

555 **Funding Sources**

556 The work was funded by the Australian Research Council (ARC; FL130100038). R.G. was funded  
557 by a Sir Henry Wellcome Fellowship award (106077/Z/14/Z). T.L. is an ARC Australian Laureate  
558 Fellow (FL130100038). J.L. is an NHMRC Principal Research Fellow (APP1157909) and C.G. is  
559 an NHMRC EL2 Fellow (APP1178715).

560

561 **Data availability**

562 The crystallographic coordinates and associated structure factors for BonA are available at the  
563 Protein Data Bank (PDB) with the accession code [6V4V](#). Small-angle X-ray scattering data for  
564 BonA full-length and BonA-27N are available in the SASBDB with the accession codes [SASDJW3](#)  
565 and [SASDJX3](#). Accession numbers of protein sequences used to construct the phylogenetic tree  
566 are provided in [Table S1](#).

567

568 **Author Contributions**

569 Conceived and designed the experiments: RG, FCM, RAD, EH, TL

570 Performed the experiments: RG, FCM, RAD, MB, DG

571 Analyzed the data: RG, FCM, RAD, MB, DG, PML, EH, TL

572 Contributed reagents/materials/analysis tools: RG, SB, HV, AYP, CG, JL, EH, TL

573 Wrote the paper: RG, TL

574 Edited and approved the manuscript: All authors

575



## 576 References

- 577 1. Boucher HW. No Drugs: No ESKAPE! An update from the infectious diseases society of  
578 America. *Clin Infect Dis*. 2009;48:1-12.
- 579 2. Hoang Quoc C, Nguyen Thi Phuong T, Nguyen Duc H, Tran Le T, Tran Thi Thu H,  
580 Nguyen Tuan S, et al. Carbapenemase genes and multidrug resistance of *Acinetobacter*  
581 *Baumannii*: A cross sectional study of patients with pneumonia in southern vietnam.  
582 *Antibiotics*. 2019;8(3):148.
- 583 3. Tacconelli E, Carrara E, Savoldi A, Harbarth S, Mendelson M, Monnet DL, et al.  
584 Discovery, research, and development of new antibiotics: the WHO priority list of antibiotic-  
585 resistant bacteria and tuberculosis. *The Lancet Infectious Diseases*. 2018;18(3):318-27.
- 586 4. Control CfD, Prevention, Health UDo, Services H. Antibiotic resistance threats in the  
587 United States 2019. Report, 2019.
- 588 5. Peleg AY, Seifert H, Paterson DL. *Acinetobacter baumannii*: emergence of a successful  
589 pathogen. *Clin Microbiol Rev*. 2008;21(3):538-82.
- 590 6. Morris FC, Dexter C, Kostoulias X, Uddin MI, Peleg A. The mechanisms of disease  
591 caused by *Acinetobacter baumannii*. *Frontiers in microbiology*. 2019;10:1601.
- 592 7. Cheah S-E, Li J, Tsuji BT, Forrest A, Bulitta JB, Nation RL. Colistin and polymyxin B  
593 dosage regimens against *Acinetobacter baumannii*: differences in activity and the emergence  
594 of resistance. *Antimicrob Agents Chemother*. 2016;60(7):3921-33.
- 595 8. Spellberg B, Rex JH. The value of single-pathogen antibacterial agents. *Nature reviews*  
596 *Drug discovery*. 2013;12(12):963-.
- 597 9. Silhavy TJ, Kahne D, Walker S. The Bacterial Cell Envelope. *Cold Spring Harbor*  
598 *Perspectives in Biology*. 2010;2(5). doi: 10.1101/cshperspect.a000414.
- 599 10. Nikaido H. Molecular basis of bacterial outer membrane permeability revisited.  
600 *Microbiol Mol Biol Rev*. 2003;67(4):593-656.
- 601 11. Sperandeo P, Martorana AM, Polissi A. Lipopolysaccharide biogenesis and transport at  
602 the outer membrane of Gram-negative bacteria. *Biochim et Biophys Acta -Molecular and Cell*  
603 *Biology of Lipids*. 2017;1862(11):1451-60.
- 604 12. Konovalova A, Kahne DE, Silhavy TJ. Outer membrane biogenesis. *Annu Rev Microbiol*.  
605 2017;71:539-56.
- 606 13. Gray AN, Egan AJ, van't Veer IL, Verheul J, Colavin A, Koumoutsis A, et al. Coordination  
607 of peptidoglycan synthesis and outer membrane constriction during *Escherichia coli* cell  
608 division. *elife*. 2015;4:e07118.
- 609 14. Isom GL, Coudray N, MacRae MR, McManus CT, Ekiert DC, Bhabha G. LetB Structure  
610 Reveals a Tunnel for Lipid Transport across the Bacterial Envelope. *Cell*. 2020;181(3):653-64.  
611 e19.
- 612 15. Kamischke C, Fan J, Bergeron J, Kulasekara HD, Dalebroux ZD, Burrell A, et al. The  
613 *Acinetobacter baumannii* Mla system and glycerophospholipid transport to the outer  
614 membrane. *Elife*. 2019;8:e40171.
- 615 16. Bakelar J, Buchanan SK, Noinaj N. The structure of the  $\beta$ -barrel assembly machinery  
616 complex. *Science*. 2016;351(6269):180-6.
- 617 17. Selkig J, Mosbahi K, Webb CT, Belousoff MJ, Perry AJ, Wells TJ, et al. Discovery of an  
618 archetypal protein transport system in bacterial outer membranes. *Nat Struct Mol Biol*.  
619 2012;19(5):506-10.



- 620 18. Collin S, Guilvout I, Nickerson NN, Pugsley AP. Sorting of an integral outer membrane  
621 protein via the lipoprotein-specific Lol pathway and a dedicated lipoprotein pilotin. *Mol*  
622 *Microbiol.* 2011;80(3):655-65.
- 623 19. Dong H, Xiang Q, Gu Y, Wang Z, Paterson NG, Stansfeld PJ, et al. Structural basis for  
624 outer membrane lipopolysaccharide insertion. *Nature.* 2014;511(7507):52-6.
- 625 20. Ekiert DC, Bhabha G, Isom GL, Greenan G, Ovchinnikov S, Henderson IR, et al.  
626 Architectures of lipid transport systems for the bacterial outer membrane. *Cell.*  
627 2017;169(2):273-85. e17.
- 628 21. Sklar JG, Wu T, Kahne D, Silhavy TJ. Defining the roles of the periplasmic chaperones  
629 SurA, Skp, and DegP in *Escherichia coli*. *Genes Dev.* 2007;21(19):2473-84.
- 630 22. Abellón-Ruiz J, Kaptan SS, Baslé A, Claudi B, Bumann D, Kleinekathöfer U, et al.  
631 Structural basis for maintenance of bacterial outer membrane lipid asymmetry. *Nature*  
632 *microbiology.* 2017;2(12):1616.
- 633 23. Josts I, Stubenrauch CJ, Vadlamani G, Mosbahi K, Walker D, Lithgow T, et al. The  
634 structure of a conserved domain of TamB reveals a hydrophobic  $\beta$  taco fold. *Structure.*  
635 2017;25(12):1898-906. e5.
- 636 24. Yeats C, Bateman A. The BON domain: a putative membrane-binding domain. *Trends*  
637 *Biochem Sci.* 2003;28(7):352-5.
- 638 25. Yan Z, Hussain S, Wang X, Bernstein HD, Bardwell JC. Chaperone OsmY facilitates the  
639 biogenesis of a major family of autotransporters. *Mol Microbiol.* 2019;112(5):1373-87.
- 640 26. Morris FC, Wells TJ, Bryant JA, Schager AE, Sevastyanovich YR, Squire DJ, et al. YraP  
641 contributes to cell envelope integrity and virulence of *Salmonella enterica* serovar  
642 Typhimurium. *Infect Immun.* 2018;86(11):e00829-17.
- 643 27. Oh J-T, Cajal Y, Skowronska EM, Belkin S, Chen J, Van Dyk TK, et al. Cationic peptide  
644 antimicrobials induce selective transcription of micF and osmY in *Escherichia coli*. *Biochimica*  
645 *et Biophysica Acta (BBA)-Biomembranes.* 2000;1463(1):43-54.
- 646 28. Bryant JA, Morris F, Knowles TJ, Maderbocus R, Heinz E, Boelter G, et al. Structure-  
647 function analyses of dual-BON domain protein DolP identifies phospholipid binding as a new  
648 mechanism for protein localisation. *bioRxiv.* 2020:2020.08.10.244616.
- 649 29. Seib KL, Haag AF, Oriente F, Fantappiè L, Borghi S, Semchenko EA, et al. The  
650 meningococcal vaccine antigen GNA2091 is an analogue of YraP and plays key roles in outer  
651 membrane stability and virulence. *The FASEB Journal.* 2019;33(11):12324-35.
- 652 30. Yim HH, Villarejo M. osmY, a new hyperosmotically inducible gene, encodes a  
653 periplasmic protein in *Escherichia coli*. *J Bacteriol.* 1992;174(11):3637-44.
- 654 31. Lennon CW, Thamsen M, Friman ET, Cacciaglia A, Sachsenhauser V, Sorgenfrei FA, et  
655 al. Folding optimization in vivo uncovers new chaperones. *J Mol Biol.* 2015;427(18):2983-94.
- 656 32. Tsang M-J, Yakhnina AA, Bernhardt TG. NlpD links cell wall remodeling and outer  
657 membrane invagination during cytokinesis in *Escherichia coli*. *PLOS Genetics.*  
658 2017;13(7):e1006888.
- 659 33. Bos MP, Grijpstra J, Tommassen-van Boxtel R, Tommassen J. Involvement of *Neisseria*  
660 *meningitidis* lipoprotein GNA2091 in the assembly of a subset of outer membrane proteins.  
661 *Journal of Biological Chemistry.* 2014;jbc. M113. 539510.
- 662 34. Ormsby MJ, Grahame E, Burchmore R, Davies RL. Comparative bioinformatic and  
663 proteomic approaches to evaluate the outer membrane proteome of the fish pathogen  
664 *Yersinia ruckeri*. *Journal of proteomics.* 2019;199:135-47.
- 665 35. Onufryk C, Crouch M-L, Fang FC, Gross CA. Characterization of six lipoproteins in the  
666  $\sigma$ E regulon. *J Bacteriol.* 2005;187(13):4552-61.

- 667 36. Baarda BI, Emerson S, Proteau PJ, Sikora AE. Deciphering the function of new  
668 gonococcal vaccine antigens using phenotypic microarrays. *J Bacteriol.* 2017;199(17):e00037-  
669 17.
- 670 37. Hart EM, Gupta M, Wühr M, Silhavy TJ. The synthetic phenotype of  $\Delta$ bamB  $\Delta$ bamE  
671 double mutants results from a lethal jamming of the bam complex by the lipoprotein RcsF.  
672 *MBio.* 2019;10(3):e00662-19.
- 673 38. Wu T, McCandlish AC, Gronenberg LS, Chng S-S, Silhavy TJ, Kahne D. Identification of a  
674 protein complex that assembles lipopolysaccharide in the outer membrane of *Escherichia*  
675 *coli*. *Proceedings of the National Academy of Sciences.* 2006;103(31):11754-9.
- 676 39. Banzhaf M, Yau HC, Verheul J, Lodge A, Kritikos G, Mateus A, et al. Outer membrane  
677 lipoprotein Nlpl scaffolds peptidoglycan hydrolases within multi-enzyme complexes in  
678 *Escherichia coli*. *The EMBO journal.* 2020;39(5):e102246.
- 679 40. Henry R, Vithanage N, Harrison P, Seemann T, Coutts S, Moffatt JH, et al. Colistin-  
680 resistant, lipopolysaccharide-deficient *Acinetobacter baumannii* responds to  
681 lipopolysaccharide loss through increased expression of genes involved in the synthesis and  
682 transport of lipoproteins, phospholipids, and poly- $\beta$ -1, 6-N-acetylglucosamine. *Antimicrobial*  
683 *agents and chemotherapy.* 2012;56(1):59-69.
- 684 41. Cheah S-E, Johnson MD, Zhu Y, Tsuji BT, Forrest A, Bulitta JB, et al. Polymyxin  
685 resistance in *Acinetobacter baumannii*: genetic mutations and transcriptomic changes in  
686 response to clinically relevant dosage regimens. *Scientific reports.* 2016;6:26233.
- 687 42. Henry R, Crane B, Powell D, Deveson Lucas D, Li Z, Aranda J, et al. The transcriptomic  
688 response of *Acinetobacter baumannii* to colistin and doripenem alone and in combination in  
689 an in vitro pharmacokinetics/pharmacodynamics model. *J Antimicrob Chemother.*  
690 2015;70(5):1303-13.
- 691 43. Potter SC, Luciani A, Eddy SR, Park Y, Lopez R, Finn RD. HMMER web server: 2018  
692 update. *Nucleic Acids Res.* 2018;46(W1):W200-W4.
- 693 44. Clemmer KM, Bonomo RA, Rather PN. Genetic analysis of surface motility in  
694 *Acinetobacter baumannii*. *Microbiology.* 2011;157(9):2534-44.
- 695 45. Craig L, Forest KT, Maier B. Type IV pili: dynamics, biophysics and functional  
696 consequences. *Nat Rev Microbiol.* 2019;17(7):429-40.
- 697 46. Krissinel E. Stock-based detection of protein oligomeric states in jsPISA. *Nucleic Acids*  
698 *Res.* 2015;43(W1):W314-W9.
- 699 47. Wu X, Chavez JD, Schweppe DK, Zheng C, Weisbrod CR, Eng JK, et al. In vivo protein  
700 interaction network analysis reveals porin-localized antibiotic inactivation in *Acinetobacter*  
701 *baumannii* strain AB5075. *Nat Commun.* 2016;7:13414.
- 702 48. Seltmann G, Holst O. Periplasmic space and rigid layer. *The Bacterial Cell Wall:*  
703 *Springer;* 2002. p. 103-32.
- 704 49. Park JS, Lee WC, Yeo KJ, Ryu KS, Kumarasiri M, Heseck D, et al. Mechanism of  
705 anchoring of OmpA protein to the cell wall peptidoglycan of the Gram-negative bacterial  
706 outer membrane. *The FASEB Journal.* 2012;26(1):219-28.
- 707 50. Armenteros JJA, Tsirigos KD, Sønderby CK, Petersen TN, Winther O, Brunak S, et al.  
708 SignalP 5.0 improves signal peptide predictions using deep neural networks. *Nat Biotechnol.*  
709 2019;37(4):420-3.
- 710 51. Li W, Godzik A. Cd-hit: a fast program for clustering and comparing large sets of  
711 protein or nucleotide sequences. *Bioinformatics.* 2006;22(13):1658-9.
- 712 52. Edgar RC. MUSCLE: a multiple sequence alignment method with reduced time and  
713 space complexity. *BMC Bioinformatics.* 2004;5(1):113.

- 714 53. Kumar S, Stecher G, Li M, Knyaz C, Tamura K. MEGA X: molecular evolutionary  
715 genetics analysis across computing platforms. *Mol Biol Evol.* 2018;35(6):1547-9.
- 716 54. Datsenko KA, Wanner BL. One-step inactivation of chromosomal genes in *Escherichia*  
717 *coli* K-12 using PCR products. *Proc Natl Acad Sci U S A.* 2000;97(12):6640-5. Epub  
718 2000/06/01.  
719 120163297 [pii]. PubMed PMID: 10829079; PubMed Central PMCID: PMC18686.
- 720 55. Choi KH, Kumar A, Schweizer HP. A 10-min method for preparation of highly  
721 electrocompetent *Pseudomonas aeruginosa* cells: application for DNA fragment transfer  
722 between chromosomes and plasmid transformation. *J Microbiol Methods.* 2006;64(3):391-7.  
723 Epub 2005/07/01.
- 724 56. Lyras D, Rood JI. Transposition of Tn4451 and Tn4453 involves a circular intermediate  
725 that forms a promoter for the large resolvase, TnpX. *Mol Microbiol.* 2000;38(3):588-601.  
726 Epub 2000/11/09.
- 727 57. Hunger M, Schmucker R, Kishan V, Hillen W. Analysis and nucleotide sequence of an  
728 origin of DNA replication in *Acinetobacter calcoaceticus* and its use for *Escherichia coli* shuttle  
729 plasmids. *Gene.* 1990;87(1):45-51. Epub 1990/03/01.
- 730 58. Dunstan RA, Hay ID, Lithgow T. Defining Membrane Protein Localization by Isopycnic  
731 Density Gradients. *Bacterial Protein Secretion Systems*; Springer; 2017. p. 81-6.
- 732 59. Webb CT, Selkig J, Perry AJ, Noinaj N, Buchanan SK, Lithgow T. Dynamic association  
733 of BAM complex modules includes surface exposure of the lipoprotein BamC. *J Mol Biol.*  
734 2012;422(4):545-55.
- 735 60. Adams PD, Afonine PV, Bunkoczi G, Chen VB, Davis IW, Echols N, et al. PHENIX: a  
736 comprehensive Python-based system for macromolecular structure solution. *Acta Crystallogr*  
737 *Sect D.* 2010;66(2):213-21.
- 738 61. Emsley P, Lohkamp B, Scott WG, Cowtan K. Features and development of Coot. *Acta*  
739 *Crystallogr Sect D.* 2010;66(4):486-501.
- 740 62. Murshudov GN, Skubak P, Lebedev AA, Pannu NS, Steiner RA, Nicholls RA, et al.  
741 REFMAC5 for the refinement of macromolecular crystal structures. *Acta Crystallogr Sect D.*  
742 2011;67(4):355-67.
- 743 63. Winn MD, Ballard CC, Cowtan KD, Dodson EJ, Emsley P, Evans PR, et al. Overview of  
744 the CCP4 suite and current developments. *Acta Crystallogr Sect D.* 2011;67(4):235-42.
- 745 64. Kirby N, Cowieson N, Hawley AM, Mudie ST, McGillivray DJ, Kusel M, et al. Improved  
746 radiation dose efficiency in solution SAXS using a sheath flow sample environment. *Acta*  
747 *Crystallographica Section D: Structural Biology.* 2016;72(12):1254-66.
- 748 65. Konarev PV, Volkov VV, Sokolova AV, Koch MH, Svergun DI. PRIMUS: a Windows PC-  
749 based system for small-angle scattering data analysis. *J Appl Crystallogr.* 2003;36(5):1277-82.
- 750 66. Schuck P. Size-Distribution Analysis of Macromolecules by Sedimentation Velocity  
751 Ultracentrifugation and Lamm Equation Modeling. *Biophys J.* 2000;78(3):1606-19.
- 752 67. Scheres SH. RELION: implementation of a Bayesian approach to cryo-EM structure  
753 determination. *Journal of structural biology.* 2012;180(3):519-30.
- 754  
755  
756

757 Figures

A

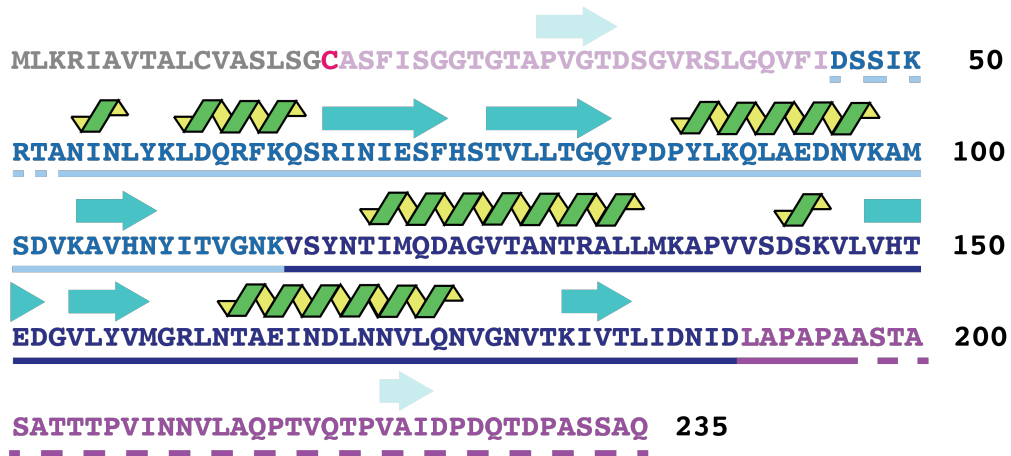

B

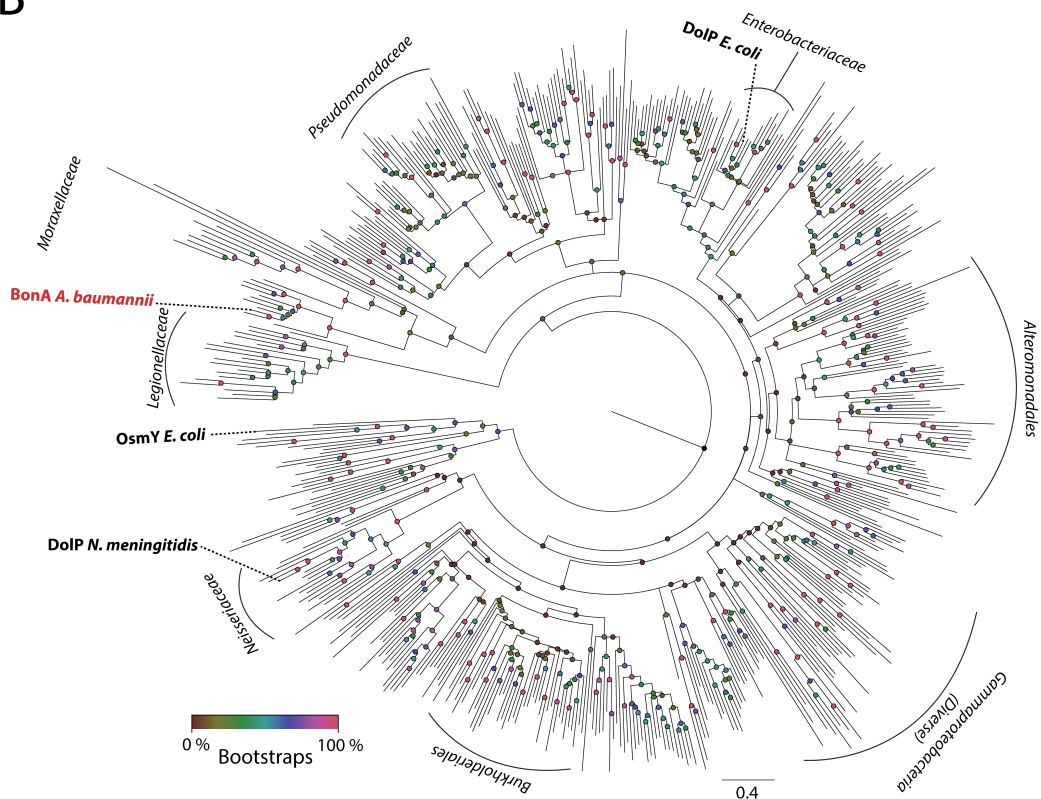

758

759 **Figure 1 The sequence, secondary structure and molecular phylogeny of BonA** (A) The amino

760 acid sequence of BonA showing secondary structure ( $\beta$ -sheet = blue arrows,  $\alpha$ -helix = green

761 spirals; predicted or based on the BonA-27N crystal structure), the location of BONA1 (light blue)

762 and BONA2 (dark blue), regions largely lacking predicted structure (purple) and the signal

763 peptide (grey) and acyl-anchored cysteine (red). Amino acids present in BonA-27N are

764 underlined, solid for those resolved in the crystal structure, and dashed for disordered regions.

765 (B) A maximum-likelihood phylogenetic tree of BonA homologs, shown in [Table S1](#), showing

766 the relatedness of BonA to the characterized family member DolP from *E. coli* and *N.*  
767 *meningitidis*. The clade containing the distinct dual-BON domain family member OsmY from *E.*  
768 *coli* was used to root the tree. Nodes are color-coded according to bootstrap values based on  
769 100 replicates.

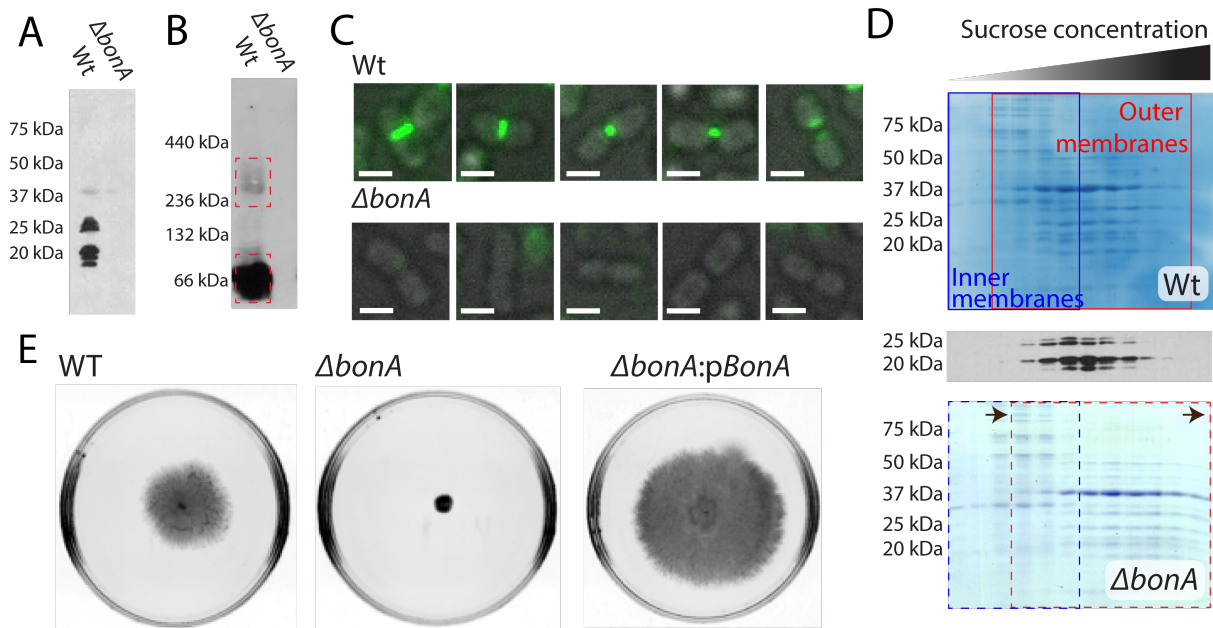

770

771

772 **Figure 2 The cellular localization of BonA and phenotypes associated with loss of BonA in A.**

773 ***baumannii*.** (A) An SDS-PAGE Western blot of total cellular membranes from wildtype and

774 *ΔbonA A. baumannii* ATCC19606 with an anti-BonA antibody, showing BonA is membrane

775 localized. (B) A blue-native PAGE Western blot of membranes as in panel A, showing BonA

776 adopts a dimer and higher MW species when purified from native membranes. (C)

777 Immunofluorescence microscopy of wildtype and *ΔbonA A. baumannii* ATCC19606 using an

778 anti-BonA antibody, showing BonA is localized to the site of cell division; Scale bar = 2 μM. (D)

779 Sucrose gradient separation of membranes from Panel A/B showing that BonA is associated

780 with fractions containing the outer membrane and that in the *ΔbonA* the outer membranes

781 exhibit a higher density on the sucrose gradient. (E) Semi-solid motility assay plates of A.

782 *baumannii* ATCC17978, showing that the *ΔbonA* is non-motile compared to the wildtype and

783 complemented mutant, where expression of BonA from pWH1266 restores this phenotype.

784



785

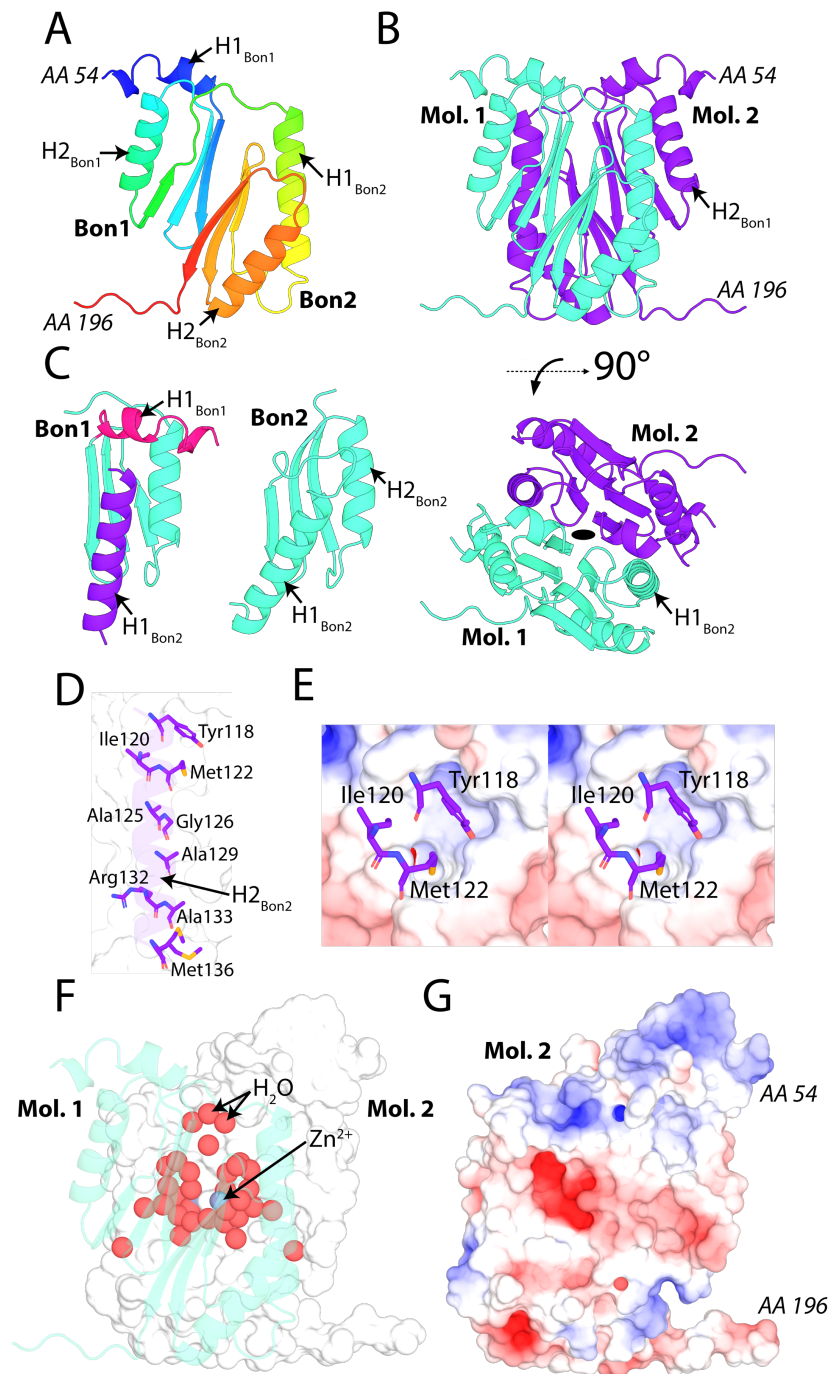

786  
787

788 **Figure 3** The crystal structure of BonA-27N reveals a dual-BON domain architecture that  
789 **dimerizes via an  $\alpha$ -helix swap mechanism.** (A) The crystal structure of BonA-27N shown as a  
790 rainbow cartoon N-terminus (blue) to C-terminus (red) displays a dual BON domain  
791 architecture with displaced  $\alpha$ -helix 1 ( $\alpha$ H1) of BON domain 1. (B) The dimer of BonA-27N  
792 observed *in crystallo*. (C) A key interface of the BonA-27N dimer involves the displacement of  
793  $\alpha$ H1 of BON1 by  $\alpha$ -helix 1 ( $\alpha$ H1) of BON2 of the opposing BonA molecule.  $\alpha$ H1 of BON2 is

794 amphipathic and interacts with the opposing molecule largely through hydrophobic  
795 interactions shown in (D) and (E). As shown in (F) and (G) the BonA dimer interface is highly  
796 hydrated and consists of both hydrophobic and polar interactions.  
797



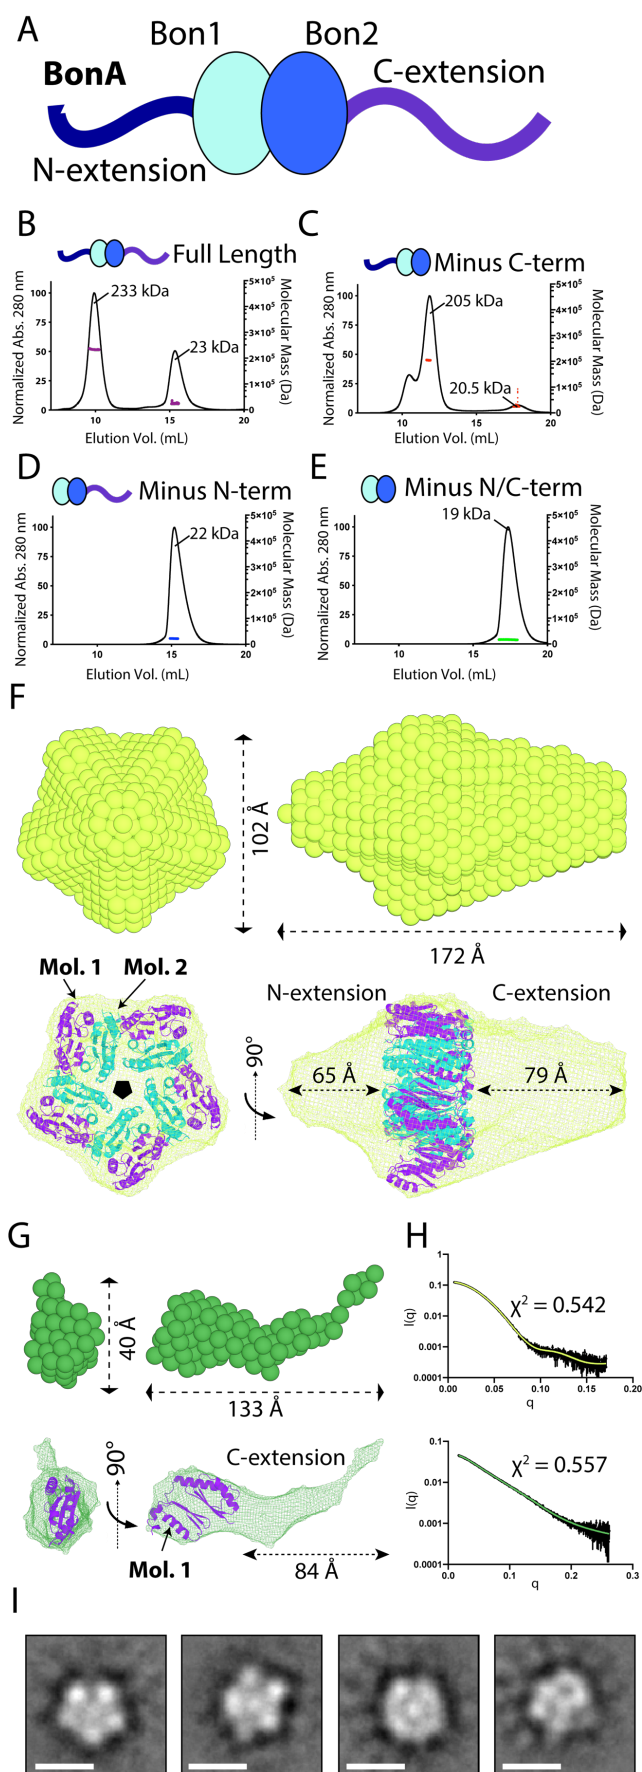

799 **Figure 4 BonA forms a decamer with pentameric symmetry mediated by its N-terminus** (A) A  
800 cartoon schematic of BonA showing its two central BON domains, with N and C-terminal  
801 extensions with limited predicted secondary structure. SEC-MALS experiments showing that  
802 (B) full-length soluble BonA and (C) a 45 amino acid C-terminally truncated variant are  
803 predominantly decamers, with some disassociation into a monomer. Conversely, (D) 27 amino  
804 acid N-terminally truncated and (E) 45 amino acid C and 27 amino acid N-terminally truncated  
805 variants both are monomers. (F) A bead model of the full-length BonA decamer modeled from  
806 SAXS data with C5 symmetry imposed (top), and a mesh representation of this bead model  
807 with the BonA-27N dimer structure modeled consistent with the observed decameric  
808 oligomerization (bottom). (G) A bead model of the BonA-27N monomer modeled from SAXS  
809 data (top), and a mesh representation of this bead model with monomer BonA-27N structure  
810 modeled. (H) The SAXS scattering curves for full-length BonA (top) and BonA-27N (bottom) in  
811 black, with simulated scattering curves for the bead models in panel A and B shown in green.  
812 (I) Class averages generated from negative stain EM images of the crosslinked BonA decamer  
813 showing a pentameric organization; Scale bar = 100 Å.

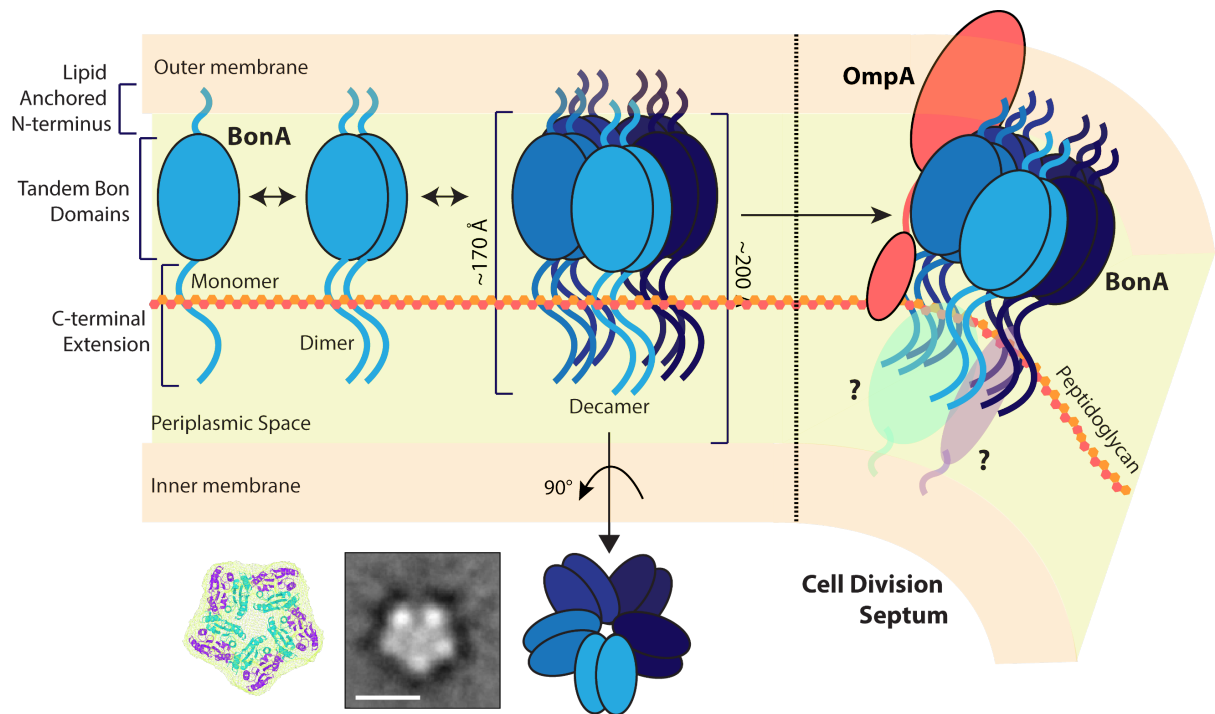

814

815

816 **Figure 5 A model of BonA localization, oligomerization, and potential function at the outer**  
817 **membrane.** BonA is anchored to the periplasmic side of the outer membrane where it forms a  
818 transient decamer that spans the majority of the periplasmic space. BonA is recruited to the  
819 site of cell division where it may interact with the peptidoglycan and act as a membrane-  
820 spanning scaffold for divisome proteins.

821 Supporting Information Legends

822

823

824 Supplemental Figures

825

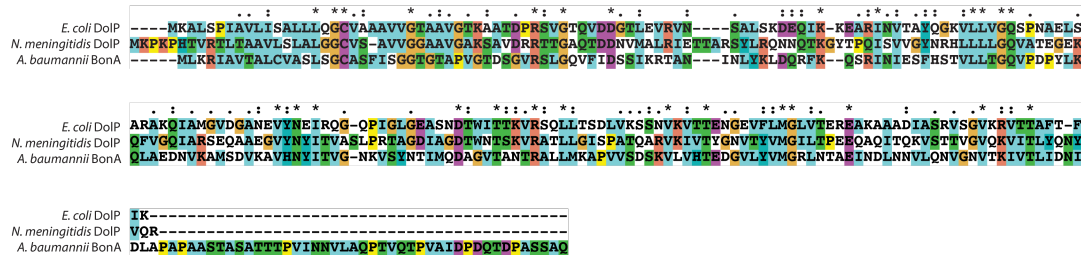

826

827

828 Figure S1 Multiple sequence alignment of BonA from *A. baumannii* and DolP from *E. coli* and

829 *N. meningitidis*. The proline-rich C-terminal extension present in BonA but absent from the *E.*

830 *coli* and *N. meningitidis* proteins is notable.

831

*A. baumannii* ATCC19606

WT

$\Delta bonA$

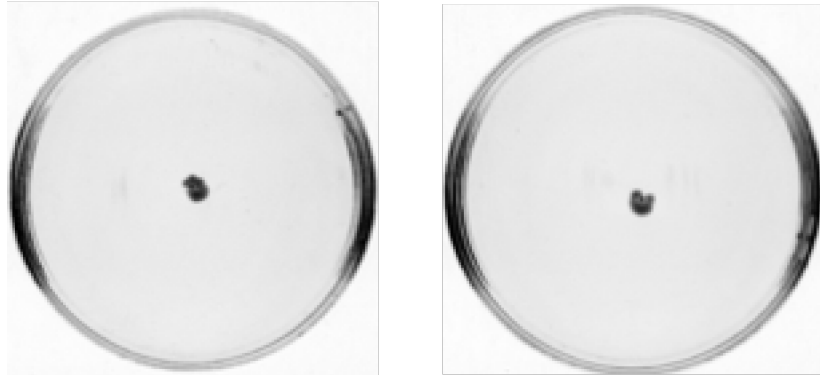

832

833

834

835

Figure S2 Semi-solid motility assay plates of *A. baumannii* ATCC19606. Showing that the wildtype strain is non-motile and therefore this phenotype is unaffected by the loss of BonA

836

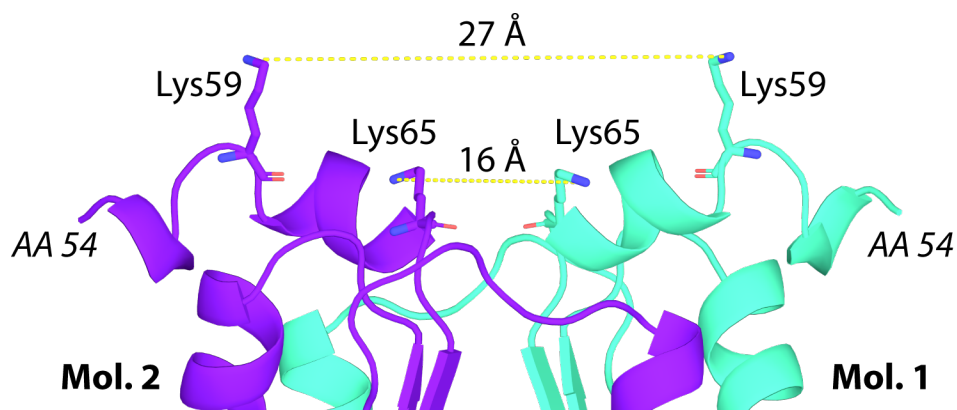

837

838

839 Figure S3 Lysine residues of BonA identified as interacting in vivo cross-linking conducted by  
840 Wu et. al. [47], shown on the structure of BonA-N27

841

842

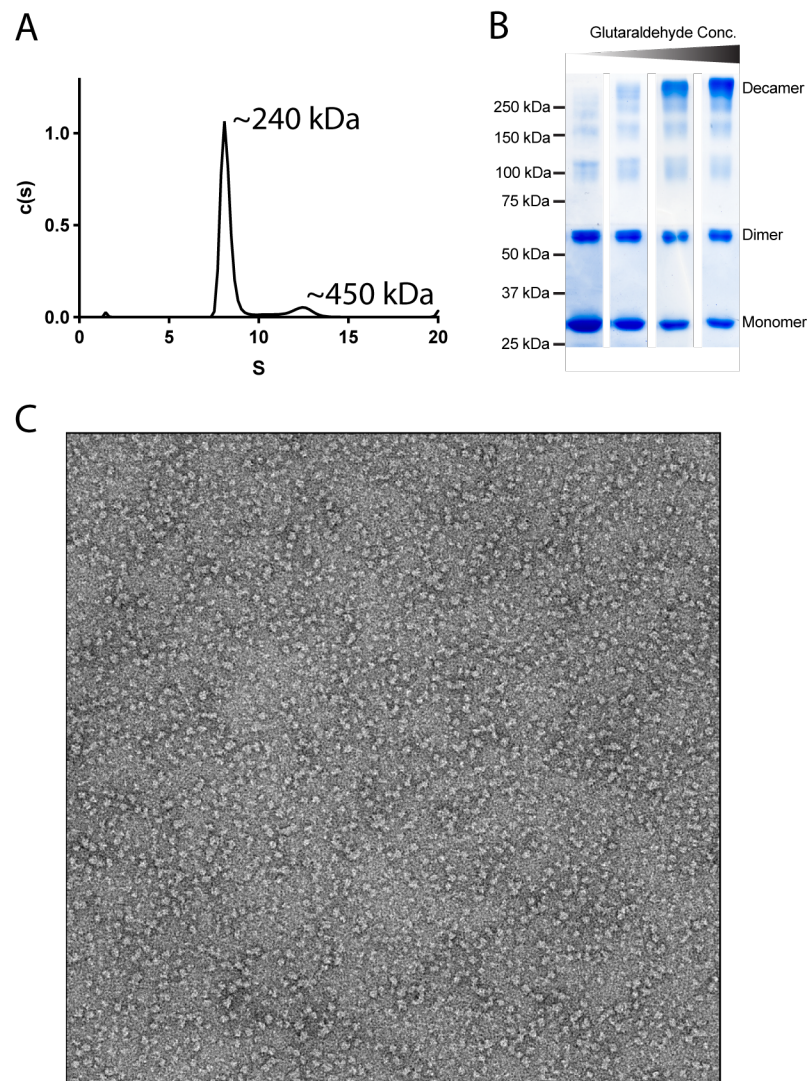

843  
844 **Figure S4 Full-length BonA forms a decameric oligomerization consisting of discrete compact**  
845 **particles.** (A) Analytical ultracentrifugation sedimentation profile for full-length BonA showing  
846 that it exists predominantly as a 240 kDa species, consistent with decameric oligomerization.  
847 (B) An SDS-PAGE gel containing the eluted peak fraction from on column crosslinking of full-  
848 length BonA, with increasing concentration of the crosslinking reagent glutaraldehyde from left  
849 to right. (C) A representative negative stain EM image of crosslinked full-length BonA from the  
850 highest glutaraldehyde concentration (0.5 %) shown in panel B.  
851

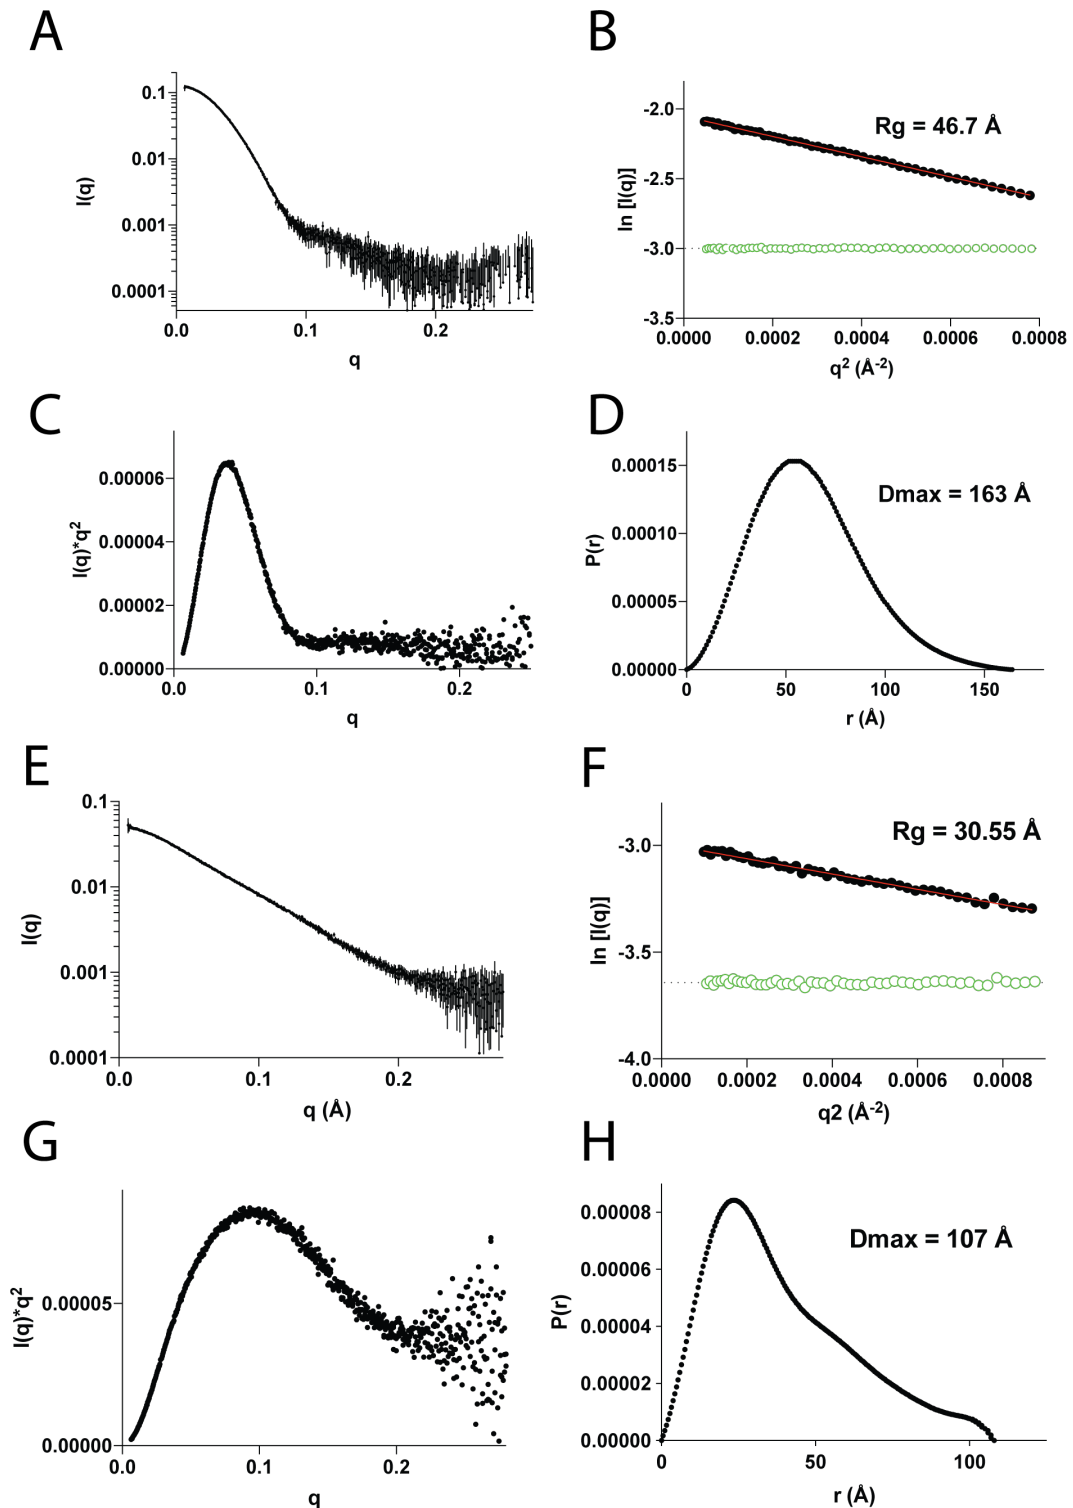

852  
853  
854  
855  
856  
857

Figure S5 SAXS scattering data plots for full-length BonA and BonA-27N. The SAXS scattering curve for full-length BonA (A), and the Guinier (B), Kratky (C) and  $P(r)$  (D) plots derived from it. The SAXS scattering curve for BonA-27N (E), and the Guinier (F), Kratky (G), and  $P(r)$  (H) plot derived from it.



858 **Supplemental Tables**

859

860 **Table S1** Sequence identity matrix of dual-BON family proteins from *A. baumannii*, *E. coli* and  
861 *N. meningitidis*

862

863 **Table S2** BonA homologs utilized for phylogenetic tree generation

864

865 **Table S3** Susceptibility of  $\Delta$ *bonA* *A. baumannii* strains to selected antimicrobial agents

866

867 **Table S4** Crystallographic data collection and refinement statistics

868

869 **Table S5** BonA-27N dimer interface statistics calculated by PISA[46]

870

871 **Table S6** Small-angle X-ray scattering data collection and modeling statistics

872

873 **Table S7** Primers and strains utilized for this study

874

875
